# Supplementary material for: Estrogen Induces Global Reorganization of Chromatin Structure in Human Breast Cancer Cells
Source: PubMed Central journal article supplement (PMC4255042; doi:10.1371/journal.pone.0113354), 2014-12-03
Supplement: pone.0113354.s001.pdf [file pone.0113354.s001.pdf]

## File S1

Supporting information file S1 includes Figures S1-S9 and Table S1.

## Figure S1

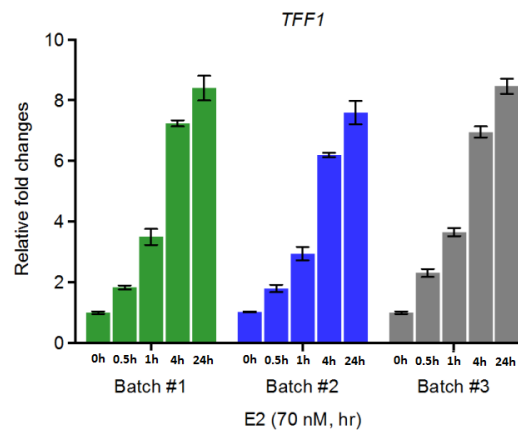

Expression analysis of *TFF1* in three different batches of cells by RT-qPCR.

Figure S2

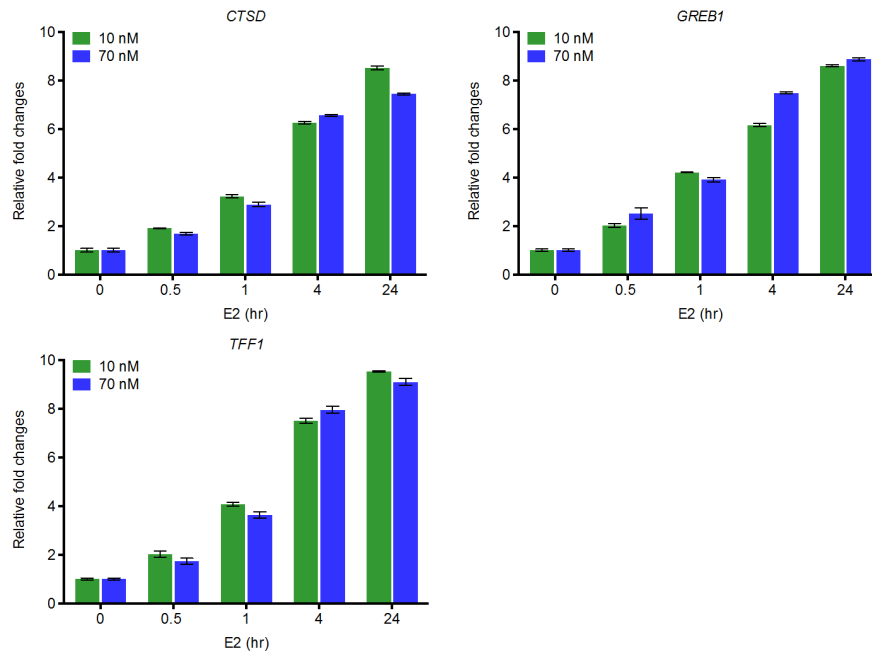

Expression analysis of three estrogen-responsive genes (*CTSD*, *GREB1* and *TFF1*) by RT-qPCR.

Figure S3

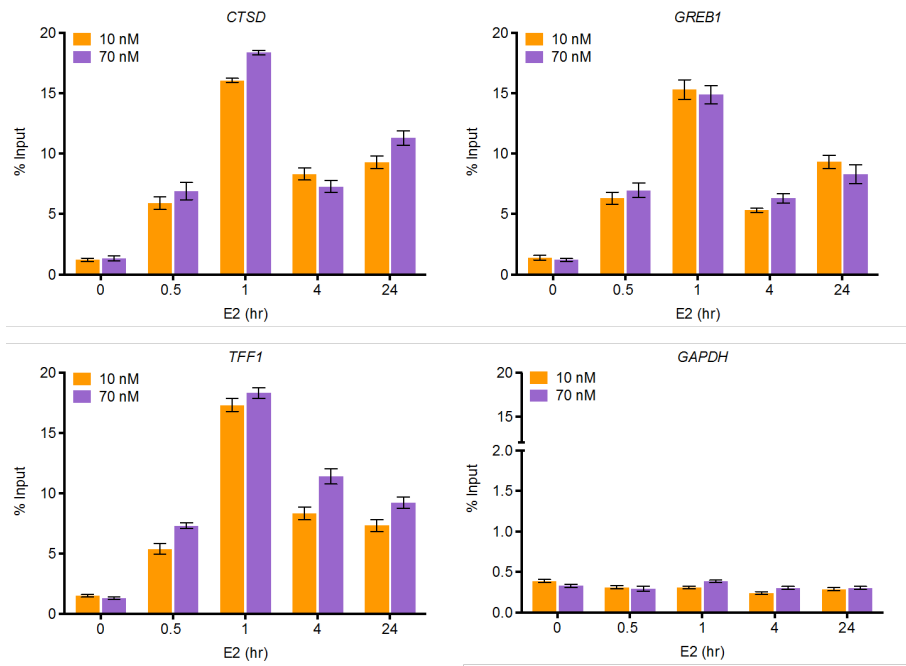

ER $\alpha$  binding of three estrogen-responsive genes (*CTSD*, *GREB1* and *TFF1*) and one gene not responsive to estrogen (*GAPDH*) by ChIP-qPCR.

Figure S4

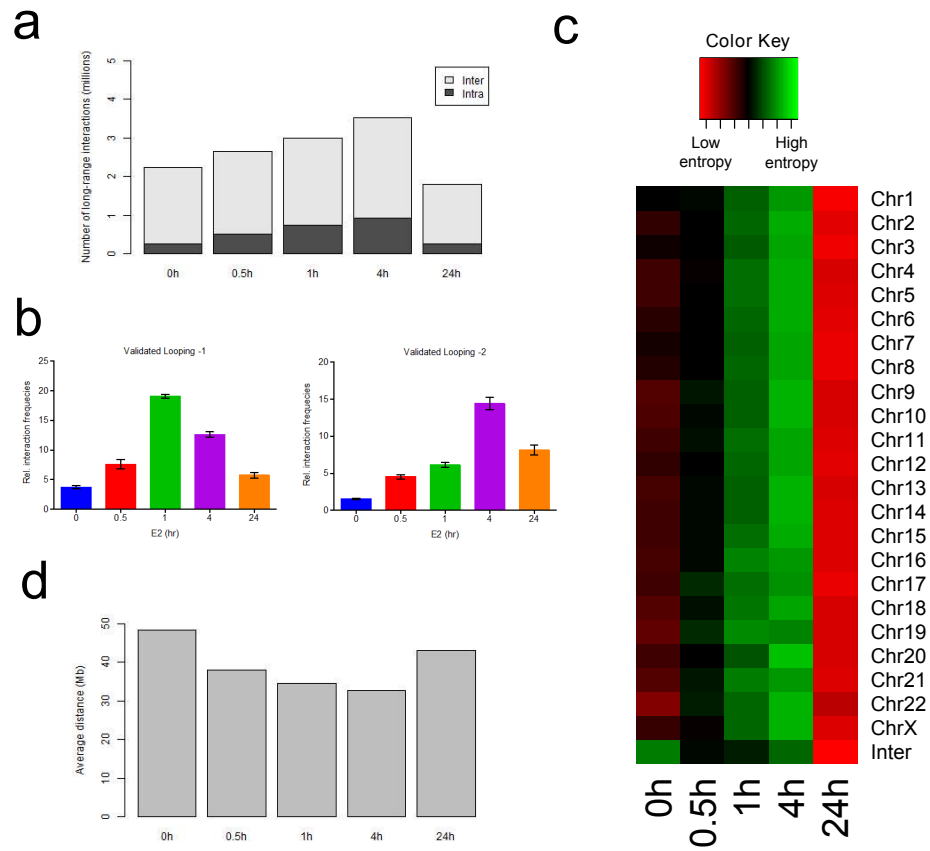

Statistical summary of intra- and interchromosomal interaction distributions over time. a) Number of intra- and interchromosomal interactions (Hi-C). b) Relative interaction frequencies measured by 3C-qPCR for two randomly chosen pairs of regions [chr9:67914751-67915000;chr4:190435001-190435250] and [chr1:121186751-121187000;chr19:32424751-32425000]. c) Entropy heatmap of interaction distributions (Hi-C). For a better visualization, row values have been scaled (Z-score). d) Average distance between interacting regions (Hi-C).

Figure S5

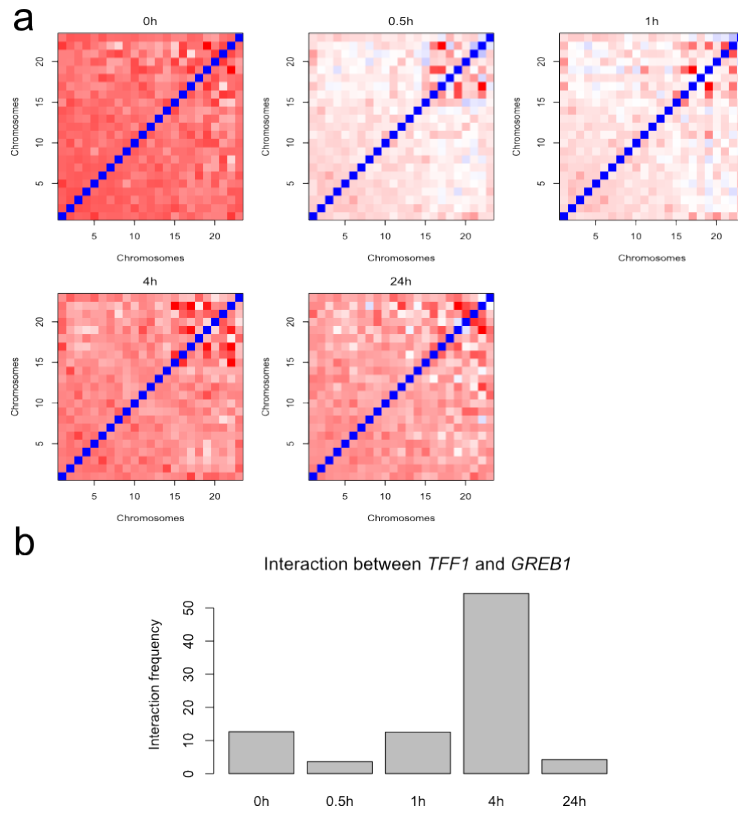

Effect of E2 on chromosome territories. a) Interchromosomal interaction frequencies between pairs of chromosomes. b) Interaction frequency between *TFF1* and *GREB1* loci (10 Mb window).

**Figure S6**

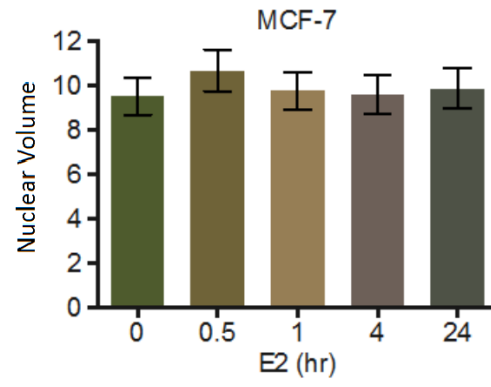

Effect of E2 on nuclear volume.

**Figure S7**

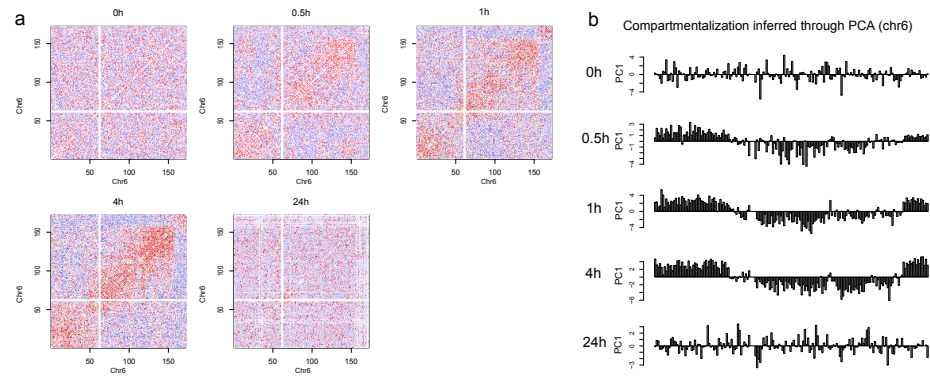

The effect of E2 on intrachromosomal interactions and chromatin compartmentalization, chromosome 6. a) Correlation heatmaps with 1 Mb binning. Red indicates positive correlation, and blue indicates negative correlation. b) First principal component (PC1) showing chromatin compartmentalization.

Figure S8

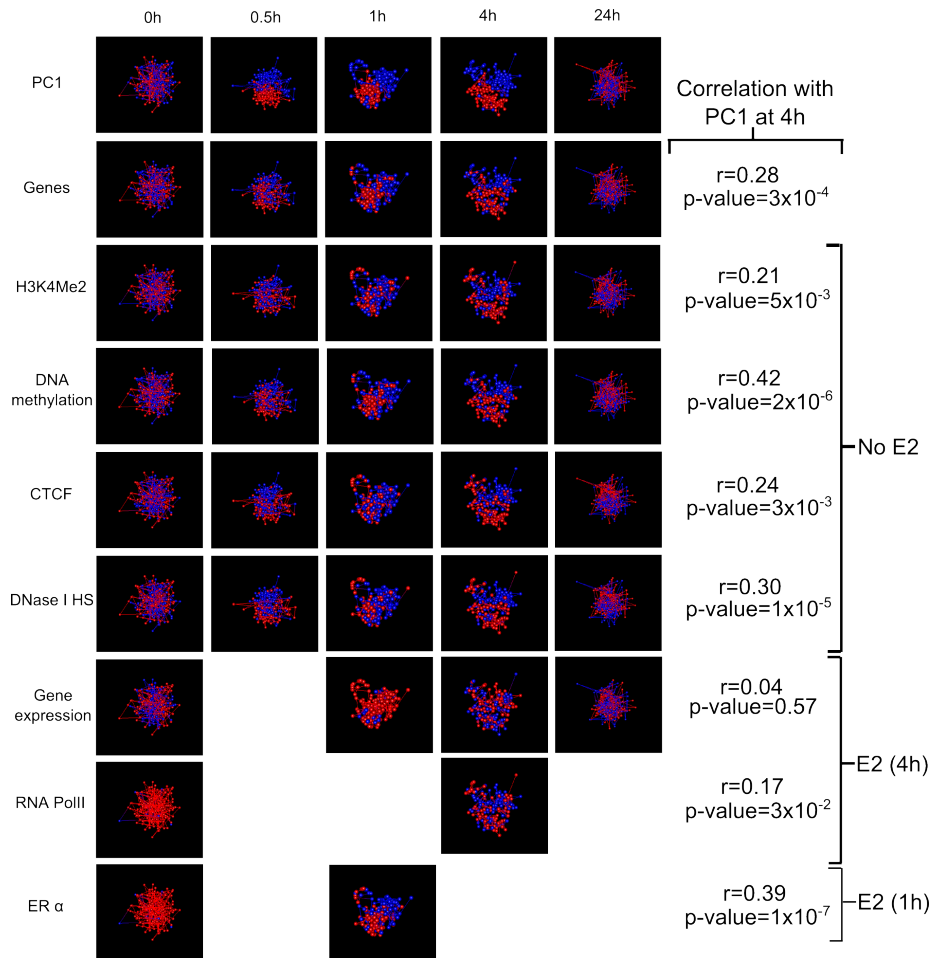

Influence of E2 on the 3D folding of genetic and epigenetic regions. Blue beads denote low values, while red beads represent high values of a genetic or epigenetic mark.



Figure S9

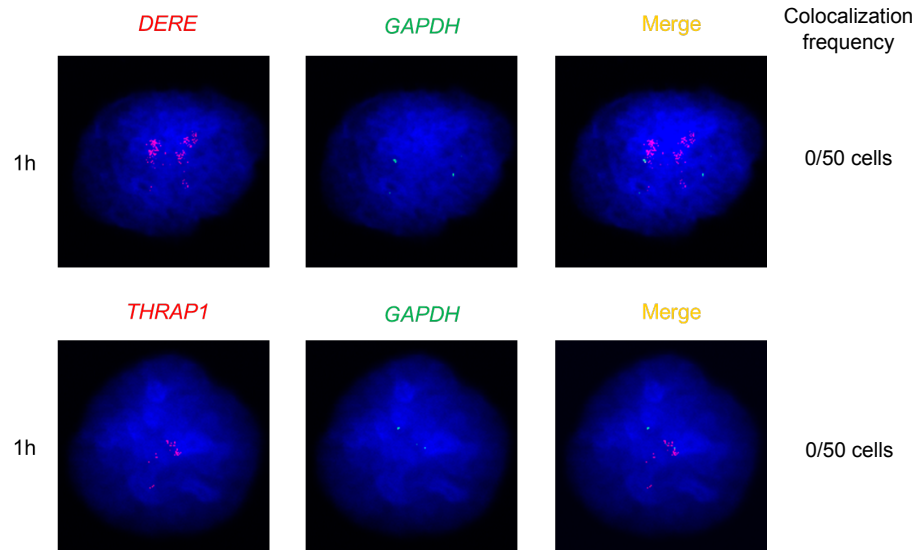

Interphase FISH control analysis between *GAPDH* [chr12:6643585-6647537] and *THRAP1* [chr17:60019966-60142643], and between *GAPDH* and 20q13 DERE [chr20:54155758-54155858].

Table S1

**a**

| Lane       | Replicate | Condition | Reads sequenced | Read mapped | InitialFilter | FilterSiteStart | FilterDuplicate | FilterLarge | FilterExtreme |
|------------|-----------|-----------|-----------------|-------------|---------------|-----------------|-----------------|-------------|---------------|
| 100707_s_1 | 1         | 0h        | 23714891        | 15762960    | 3787236       | 3411555         | 3274252         | 3215077     | 2963557       |
| 100729_s_1 | 1         | 0h        | 32654662        | 16669446    | 4445150       | 3997889         | 3860393         | 3799111     | 3524919       |
| 100729_s_2 | 2         | 0h        | 34728746        | 22619722    | 5261271       | 4775640         | 4496016         | 4399819     | 4002147       |
| 100729_s_3 | 2         | 0h        | 33616742        | 22464355    | 5234498       | 4748195         | 4472583         | 4377302     | 3983192       |
| 100707_s_2 | 1         | 0.5h      | 25832738        | 18442486    | 4306334       | 4007157         | 3844485         | 3760260     | 3419615       |
| 100729_s_4 | 1         | 0.5h      | 36096633        | 24016203    | 5554399       | 5177640         | 4913734         | 4798769     | 4351904       |
| 100729_s_5 | 2         | 0.5h      | 35788342        | 23519024    | 5477680       | 5099777         | 4851619         | 4750434     | 4335394       |
| 100729_s_6 | 2         | 0.5h      | 36113515        | 23681252    | 5441553       | 5068011         | 4816607         | 4706558     | 4271525       |
| 100707_s_3 | 1         | 1h        | 22301542        | 16188947    | 3888909       | 3556094         | 3314792         | 3245186     | 2961147       |
| 100707_s_4 | 1         | 1h        | 23303215        | 16848299    | 4129130       | 3772181         | 3515618         | 3445695     | 3150447       |
| 100729_s_7 | 2         | 1h        | 33267964        | 22449379    | 5394316       | 4942396         | 4523265         | 4429983     | 4038729       |
| 100729_s_8 | 2         | 1h        | 32849912        | 21738266    | 5180665       | 4741966         | 4349601         | 4258969     | 3883237       |
| 100707_s_5 | 1         | 4h        | 29436858        | 20768858    | 5724675       | 5254352         | 4642341         | 4560706     | 4183831       |
| 100707_s_6 | 1         | 4h        | 29022020        | 20483400    | 5615143       | 5157081         | 4546692         | 4464024     | 4085605       |
| 100804_s_1 | 2         | 4h        | 29982402        | 10175562    | 3783603       | 3419413         | 3249238         | 3215593     | 3026569       |
| 100804_s_2 | 2         | 4h        | 30485889        | 20118312    | 5987732       | 5476603         | 4904305         | 4830733     | 4461750       |
| 100707_s_7 | 1         | 24h       | 20719307        | 15118233    | 3362734       | 3113327         | 2867233         | 2806955     | 2582920       |
| 100707_s_8 | 1         | 24h       | 20556195        | 14807486    | 3266856       | 3020393         | 2802011         | 2750109     | 2541202       |
| 100804_s_3 | 2         | 24h       | 27231023        | 19191623    | 4257600       | 3945025         | 3603388         | 3528464     | 3245875       |
| 100804_s_4 | 2         | 24h       | 27092982        | 18824355    | 4177821       | 3865586         | 3547904         | 3476201     | 3206297       |

**b**

| Replicate | Condition | Reads sequenced | Read mapped | InitialFilter | FilterSiteStart | FilterDuplicate | FilterLarge | FilterExtreme |
|-----------|-----------|-----------------|-------------|---------------|-----------------|-----------------|-------------|---------------|
| 1         | 0h        | 56369553        | 32432406    | 8232386       | 7409444         | 7007798         | 6888607     | 6351475       |
| 2         | 0h        | 68345488        | 45084077    | 10495769      | 9523835         | 8755288         | 8567914     | 7769762       |
| 1         | 0.5h      | 61929371        | 42458689    | 9860733       | 9184797         | 8594602         | 8398510     | 7596512       |
| 2         | 0.5h      | 71901857        | 47200276    | 10919233      | 10167788        | 9494019         | 9285036     | 8432253       |
| 1         | 1h        | 45604757        | 33037246    | 8018039       | 7328275         | 6620633         | 6484090     | 5896429       |
| 2         | 1h        | 66117876        | 44187645    | 10574981      | 9684362         | 8617500         | 8436743     | 7661623       |
| 1         | 4h        | 58458878        | 41252258    | 11339818      | 10411433        | 8844431         | 8683315     | 7931010       |
| 2         | 4h        | 60468291        | 30293874    | 9771335       | 8896016         | 7927661         | 7821881     | 7250596       |
| 1         | 24h       | 41275502        | 29925719    | 6629590       | 6133720         | 5562987         | 5452187     | 5015015       |
| 2         | 24h       | 54324005        | 38015978    | 8435421       | 7810611         | 7035673         | 6890493     | 6331008       |

**c**

| Condition | Reads sequenced | Read mapped | Initial Filtered | FilterSiteStart | FilterDuplicate | FilterLarge | FilterExtreme |
|-----------|-----------------|-------------|------------------|-----------------|-----------------|-------------|---------------|
| 0h        | 124715041       | 77516483    | 18728155         | 16933279        | 15498412        | 15195377    | 13835097      |
| 0.5h      | 133831228       | 89658965    | 20779966         | 19352585        | 17816162        | 17417557    | 15759919      |
| 1h        | 111722633       | 77224891    | 18593020         | 17012637        | 14897915        | 14585422    | 13222156      |
| 4h        | 118927169       | 71546132    | 21111153         | 19307449        | 16361106        | 16097887    | 14763310      |
| 24h       | 95599507        | 67941697    | 15065011         | 13944331        | 12456223        | 12203341    | 11193041      |

Number of reads obtained after Hi-C data preprocessing. a) Lane level. b) Replicate level. c) Time point level.
